# Supplementary material for: The Long Linker Region of Telomere-Binding Protein TRF2 Is Responsible for Interactions with Lamins
Source: PubMed Central journal article supplement (PMC8036907; doi:10.3390/ijms22073293), 2021-03-24
Supplement: ijms-22-03293-s001.pdf [file ijms-22-03293-s001.pdf]

**Figure S1.** Prediction of secondary structure dynamics of TRF2 using the IUPred predictor (<http://iupred.enzim.hu>). IUPred2 scores characterize the disordered tendency of each position along the sequence, residues with a predicted score above 0.5 are considered disordered; ANCHOR2 scores characterize the probability of each residue being part of a binding region.

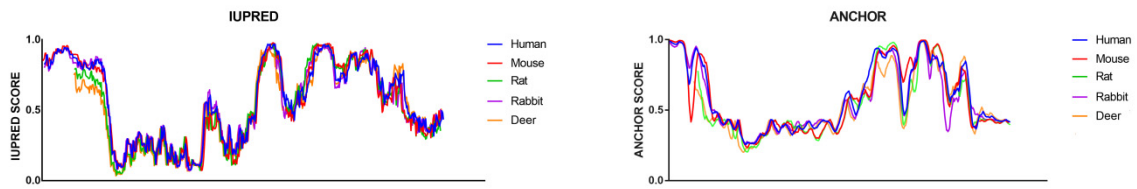

**Table S1.** Mass spectrometric analysis reveals that peptides are common to lamins A and C or immature prelamin A/C. Peptides in the first column were detected at least once in two independent runs.

| Peptide         | Residues in prelamin A/C |
|-----------------|--------------------------|
| LQEKEDLQELNDR   | 29–41                    |
| LQTLKEELDFQK    | 198–210                  |
| LADALQELR       | 241–250                  |
| NSNLVGAAHEELQQR | 280–296                  |
| VAVEEVDEEGKFVR  | 439–453                  |
| AQNTWGCSSLR     | 516–529                  |
